# Supplementary material for: Mitochondrial genome evolution in the Saccharomyces sensu stricto complex
Source: PubMed Central journal article supplement (PMC5558958; doi:10.1371/journal.pone.0183035), 2017-08-16
Supplement: pone.0183035.s002.pdf [file pone.0183035.s002.pdf]

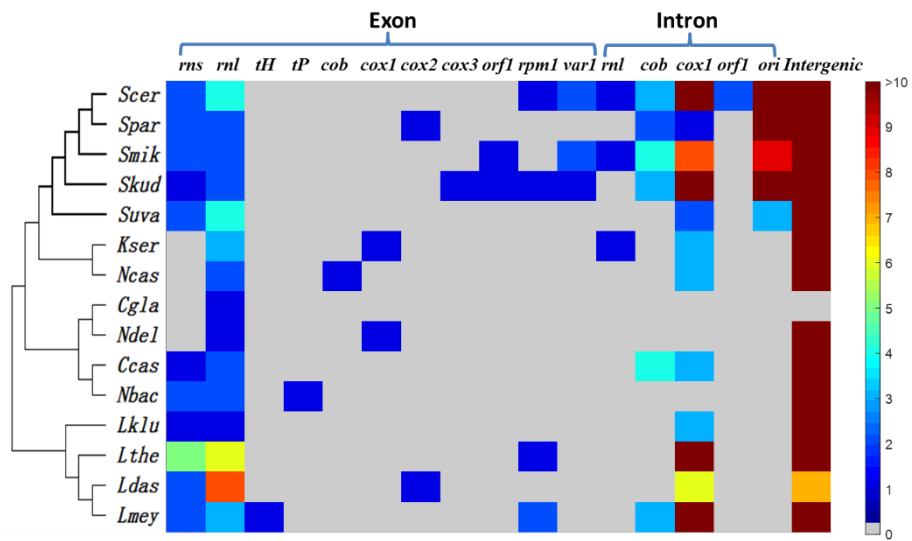

**S2 Fig. The distribution of GC clusters in mitochondrial genomes.** The gray color referred to no GC cluster insertion; the blue color referred to fewer GC clusters insertion (1 - 3); the red color referred to more GC clusters insertion (8 - 10); the dark red referred to the number of GC clusters is larger than 10. The detailed number of GC clusters was shown in S4 Table.
