# Supplementary material for: Mitochondrial genome evolution in the Saccharomyces sensu stricto complex
Source: PubMed Central journal article supplement (PMC5558958; doi:10.1371/journal.pone.0183035), 2017-08-16
Supplement: pone.0183035.s003.pdf [file pone.0183035.s003.pdf]

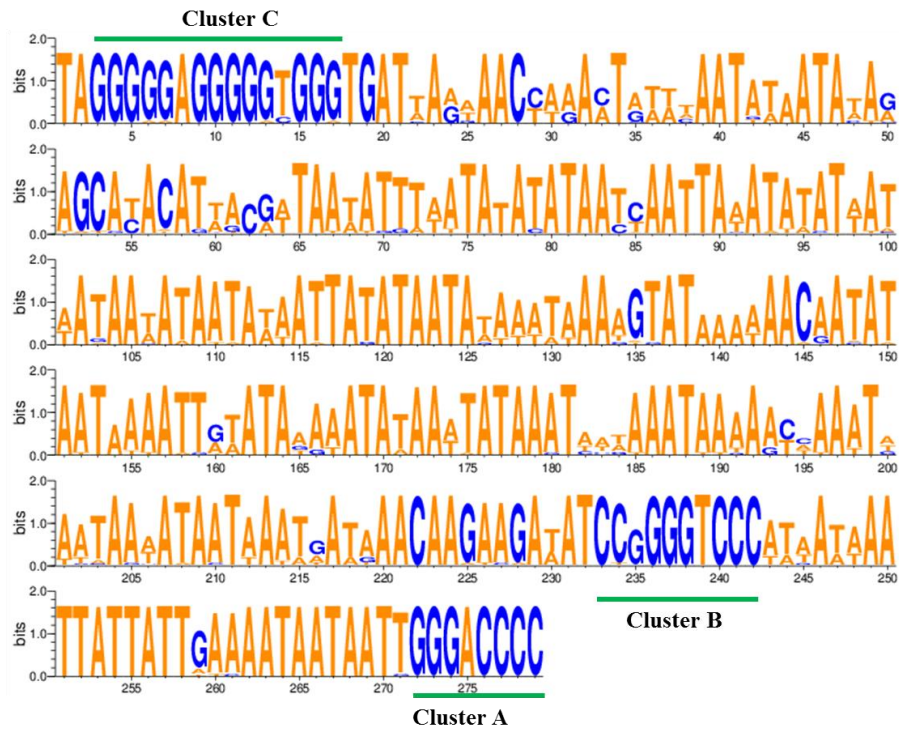

**S3 Fig. The logos figure of *ori* sequences for five SSS yeasts.** All 24 *ori* sequences were aligned with MEGA software (Tamura, Stecher et al. 2013). The intervening GC clusters and AT segment in some *ori* sequences were removed before drawing. The figure was created by WebLogo (Crooks, Hon et al. 2004).
