# Supplementary material for: Mitochondrial genome evolution in the Saccharomyces sensu stricto complex
Source: PubMed Central journal article supplement (PMC5558958; doi:10.1371/journal.pone.0183035), 2017-08-16
Supplement: pone.0183035.s004.pdf [file pone.0183035.s004.pdf]

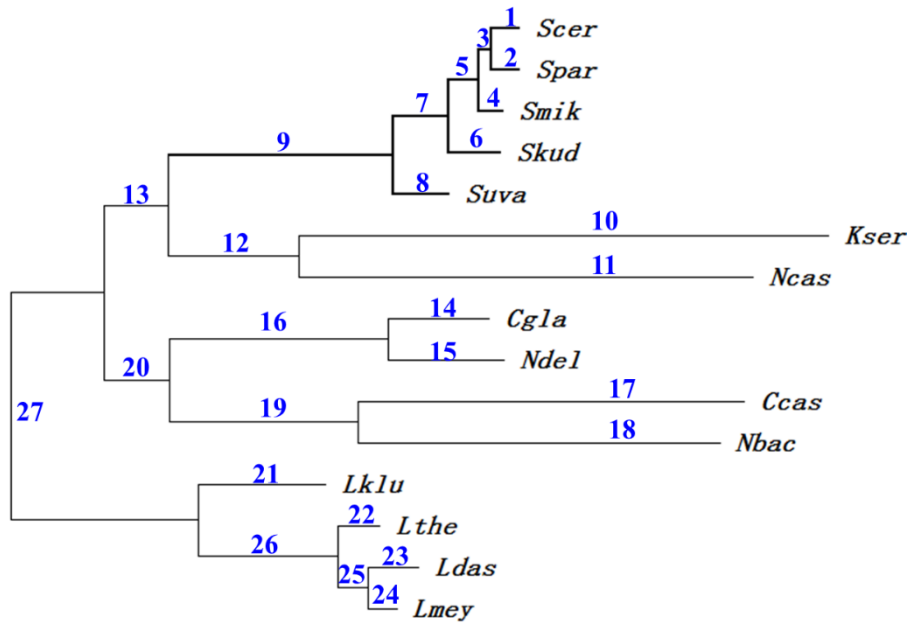

**S4 Fig.** The number symbol for each evolutionary branch in the phylogenetic tree. The tree had totally 27 evolutionary branches.
