# Supplementary material for: Mitochondrial genome evolution in the Saccharomyces sensu stricto complex
Source: PubMed Central journal article supplement (PMC5558958; doi:10.1371/journal.pone.0183035), 2017-08-16
Supplement: pone.0183035.s005.pdf [file pone.0183035.s005.pdf]

**S1 Table. Gene coordinates in mitochondrial genomes of *S.mikatae* and *S.kudriavzevii***

| <i>S.mikatae</i>     | Coordinates            |       |         | <i>S.kudriavzevii</i> | Coordinates |                        |         |
|----------------------|------------------------|-------|---------|-----------------------|-------------|------------------------|---------|
|                      | <i>Genetic element</i> | Start | End     |                       | Orientation | <i>Genetic element</i> | Start   |
| <i>rnl exon1</i>     | 789                    | 3469  | Direct  | <i>rnl</i>            | 537         | 3802                   | Direct  |
| <i>Intron rnl</i>    | 3470                   | 3862  | Direct  | <i>tRNA-Thr2</i>      | 5237        | 5312                   | Direct  |
| <i>rnl exon2</i>     | 3863                   | 4441  | Direct  | <i>tRNA-Cys</i>       | 5915        | 5987                   | Direct  |
| <i>tRNA-Thr2</i>     | 5483                   | 5558  | Direct  | <i>tRNA-His</i>       | 6025        | 6099                   | Direct  |
| <i>tRNA-Cys</i>      | 6057                   | 6129  | Direct  | <i>tRNA-Leu</i>       | 6849        | 6933                   | Direct  |
| <i>tRNA-His</i>      | 6221                   | 6295  | Direct  | <i>tRNA-Gln</i>       | 6952        | 7027                   | Direct  |
| <i>tRNA-Leu</i>      | 7420                   | 7504  | Direct  | <i>tRNA-Lys</i>       | 7817        | 7888                   | Direct  |
| <i>tRNA-Gln</i>      | 7528                   | 7603  | Direct  | <i>tRNA-Arg1</i>      | 8190        | 8262                   | Direct  |
| <i>tRNA-Lys</i>      | 8507                   | 8580  | Direct  | <i>tRNA-Gly</i>       | 8400        | 8471                   | Direct  |
| <i>tRNA-Arg1</i>     | 8733                   | 8805  | Direct  | <i>tRNA-Asp</i>       | 9560        | 9632                   | Direct  |
| <i>tRNA-Gly</i>      | 8853                   | 8927  | Direct  | <i>tRNA-Ser1</i>      | 10633       | 10718                  | Direct  |
| <i>tRNA-Asp</i>      | 9538                   | 9612  | Direct  | <i>tRNA-Arg2</i>      | 10725       | 10797                  | Direct  |
| <i>tRNA-Ser1</i>     | 10565                  | 10650 | Direct  | <i>tRNA-Ala</i>       | 11650       | 11725                  | Direct  |
| <i>tRNA-Arg2</i>     | 10651                  | 10724 | Direct  | <i>tRNA-Ile</i>       | 11848       | 11922                  | Direct  |
| <i>tRNA-Ala</i>      | 11109                  | 11184 | Direct  | <i>tRNA-Tyr</i>       | 12402       | 12485                  | Direct  |
| <i>tRNA-Ile</i>      | 11409                  | 11484 | Direct  | <i>tRNA-Asn</i>       | 13001       | 13071                  | Direct  |
| <i>tRNA-Tyr</i>      | 12172                  | 12253 | Direct  | <i>tRNA-Met1</i>      | 13540       | 13614                  | Direct  |
| <i>tRNA-Asn</i>      | 12813                  | 12883 | Direct  | <i>cox2</i>           | 14358       | 15113                  | Direct  |
| <i>tRNA-Met1</i>     | 13843                  | 13918 | Direct  | <i>ORF1</i>           | 15095       | 16519                  | Direct  |
| <i>cox2</i>          | 15048                  | 15803 | Direct  | <i>tRNA-Phe</i>       | 18276       | 18347                  | Direct  |
| <i>ORF1</i>          | 15785                  | 17200 | Direct  | <i>tRNA-Thr1</i>      | 18643       | 18714                  | Reverse |
| <i>tRNA-Phe</i>      | 18161                  | 18235 | Direct  | <i>tRNA-Val</i>       | 19579       | 19654                  | Direct  |
| <i>tRNA-Thr1</i>     | 18844                  | 18917 | Reverse | <i>cox3</i>           | 20450       | 21259                  | Direct  |
| <i>tRNA-Val</i>      | 19251                  | 19326 | Direct  | <i>Rep-origin1</i>    | 24351       | 24594                  | Direct  |
| <i>cox3</i>          | 19933                  | 20742 | Direct  | <i>Rep-origin2</i>    | 28537       | 28796                  | Reverse |
| <i>Rep-origin1</i>   | 24731                  | 24995 | Direct  | <i>tRNA-Met2</i>      | 31334       | 31411                  | Direct  |
| <i>tRNA-Met2</i>     | 27327                  | 27404 | Direct  | <i>rnp1</i>           | 32129       | 32549                  | Direct  |
| <i>rnp1</i>          | 27866                  | 28239 | Direct  | <i>tRNA-Pro</i>       | 32743       | 32814                  | Direct  |
| <i>tRNA-Pro</i>      | 29004                  | 29075 | Direct  | <i>cox1 exon1</i>     | 34268       | 34507                  | Direct  |
| <i>cox1 exon1</i>    | 32094                  | 32262 | Direct  | <i>Intron cox1.1</i>  | 34508       | 36071                  | Direct  |
| <i>Intron cox1.1</i> | 32263                  | 34710 | Direct  | <i>cox1 exon2</i>     | 36072       | 36217                  | Direct  |
| <i>cox1 exon2</i>    | 34711                  | 34781 | Direct  | <i>Intron cox1.2</i>  | 36218       | 37231                  | Direct  |
| <i>Intron cox1.2</i> | 34782                  | 36398 | Direct  | <i>cox1 exon3</i>     | 37232       | 37554                  | Direct  |
| <i>cox1 exon3</i>    | 36399                  | 36544 | Direct  | <i>Intron cox1.3</i>  | 37555       | 39633                  | Direct  |
| <i>Intron cox1.3</i> | 36545                  | 37428 | Direct  | <i>cox1 exon4</i>     | 39634       | 39895                  | Direct  |
| <i>cox1 exon4</i>    | 37429                  | 37751 | Direct  | <i>Intron cox1.4</i>  | 39896       | 41263                  | Direct  |
| <i>Intron cox1.4</i> | 37752                  | 39773 | Direct  | <i>cox1 exon5</i>     | 41264       | 41424                  | Direct  |
| <i>cox1 exon5</i>    | 39774                  | 40035 | Direct  | <i>Intron cox1.5</i>  | 41425       | 42297                  | Direct  |
| <i>Intron cox1.5</i> | 40036                  | 41406 | Direct  | <i>cox1 exon6</i>     | 42298       | 42770                  | Direct  |
| <i>cox1 exon6</i>    | 41407                  | 41542 | Direct  | <i>atp8</i>           | 43984       | 44130                  | Direct  |
| <i>Intron cox1.6</i> | 41543                  | 43088 | Direct  | <i>atp6</i>           | 44425       | 45204                  | Direct  |
| <i>cox1 exon7</i>    | 43089                  | 43113 | Direct  | <i>Rep-origin3</i>    | 49795       | 50056                  | Reverse |
| <i>Intron cox1.7</i> | 43114                  | 44003 | Direct  | <i>tRNA-Glu</i>       | 50623       | 50694                  | Direct  |
| <i>cox1 exon8</i>    | 44004                  | 44476 | Direct  | <i>cob exon1</i>      | 51650       | 52042                  | Direct  |
| <i>atp8</i>          | 45692                  | 45838 | Direct  | <i>Intron cob1</i>    | 52043       | 52685                  | Direct  |
| <i>atp6</i>          | 46297                  | 47076 | Direct  | <i>cob exon2</i>      | 52686       | 52707                  | Direct  |

|                    |       |       |         |                    |       |       |         |
|--------------------|-------|-------|---------|--------------------|-------|-------|---------|
| <i>Rep-origin2</i> | 48694 | 48957 | Direct  | <i>Intron cob2</i> | 52708 | 53570 | Direct  |
| <i>tRNA-Glu</i>    | 52220 | 52291 | Direct  | <i>cob exon3</i>   | 53571 | 53584 | Direct  |
| <i>cob exon1</i>   | 53399 | 53791 | Direct  | <i>Intron cob3</i> | 53585 | 54853 | Direct  |
| <i>Intron cob1</i> | 53792 | 55143 | Direct  | <i>cob exon4</i>   | 54854 | 54930 | Direct  |
| <i>cob exon2</i>   | 55144 | 55165 | Direct  | <i>Intron cob4</i> | 54931 | 56499 | Direct  |
| <i>Intron cob2</i> | 55166 | 55947 | Direct  | <i>cob exon5</i>   | 56500 | 57151 | Direct  |
| <i>cob exon3</i>   | 55948 | 55961 | Direct  | <i>Rep-origin4</i> | 58193 | 58454 | Direct  |
| <i>Intron cob3</i> | 55962 | 57230 | Direct  | <i>rns</i>         | 59421 | 61024 | Direct  |
| <i>cob exon4</i>   | 57231 | 57307 | Direct  | <i>tRNA-Trp</i>    | 62635 | 62708 | Direct  |
| <i>Intron cob4</i> | 57308 | 58869 | Direct  | <i>var1</i>        | 65351 | 66518 | Reverse |
| <i>cob exon5</i>   | 58870 | 59119 | Direct  | <i>tRNA-Ser2</i>   | 67920 | 68008 | Reverse |
| <i>Intron cob5</i> | 59120 | 60607 | Direct  | <i>atp9</i>        | 69746 | 69976 | Reverse |
| <i>cob exon6</i>   | 60608 | 60657 | Direct  |                    |       |       |         |
| <i>Intron cob6</i> | 60658 | 61261 | Direct  |                    |       |       |         |
| <i>cob exon7</i>   | 61262 | 61613 | Direct  |                    |       |       |         |
| <i>Rep-origin3</i> | 62514 | 62779 | Reverse |                    |       |       |         |
| <i>rns</i>         | 63621 | 65268 | Direct  |                    |       |       |         |
| <i>tRNA-Trp</i>    | 66749 | 66822 | Direct  |                    |       |       |         |
| <i>atp9</i>        | 67942 | 68172 | Direct  |                    |       |       |         |
| <i>tRNA-Ser2</i>   | 69257 | 69346 | Reverse |                    |       |       |         |
| <i>var1</i>        | 69915 | 71134 | Reverse |                    |       |       |         |

Note: The table showed the coordinates of 35 genes and their introns in *S.mikatae* and *S.kudriavzevii*.
