# Supplementary material for: Mitochondrial genome evolution in the Saccharomyces sensu stricto complex
Source: PubMed Central journal article supplement (PMC5558958; doi:10.1371/journal.pone.0183035), 2017-08-16
Supplement: pone.0183035.s006.pdf [file pone.0183035.s006.pdf]

**S2 Table. The MT genome sizes of fifteen yeasts**

| <b>Species</b> | <b>All</b> | <b>Gene</b> | <b>Intron</b> | <b>Intergenic</b> |
|----------------|------------|-------------|---------------|-------------------|
| Lmey           | 35864      | 13793(38%)  | 11157(31%)    | 10914(30%)        |
| Ldas           | 26326      | 13940(53%)  | 5494(21%)     | 6892(26%)         |
| Lthe           | 23584      | 13557(57%)  | 4326(18%)     | 5701(24%)         |
| Lklu           | 51679      | 13768(27%)  | 8399(16%)     | 29512(57%)        |
| Nbac           | 107123     | 13114(12%)  | 0(0%)         | 94009(88%)        |
| Ccas           | 50294      | 13192(26%)  | 7931(16%)     | 29171(58%)        |
| Ndel           | 37016      | 12971(35%)  | 5249(14%)     | 18796(51%)        |
| Cgla           | 20063      | 13120(65%)  | 3989(20%)     | 2954(15%)         |
| Ncas           | 25753      | 13027(51%)  | 1610(6%)      | 11116(43%)        |
| Kser           | 30782      | 12781(42%)  | 5176(17%)     | 12825(42%)        |
| Suva           | 63999      | 13565(21%)  | 8435(13%)     | 41999(66%)        |
| Skud           | 72095      | 13766(19%)  | 11242(16%)    | 47087(65%)        |
| Smik           | 73485      | 13823(19%)  | 18228(25%)    | 41434(56%)        |
| Spar           | 71355      | 13531(19%)  | 11091(16%)    | 46733(65%)        |
| Scer           | 85779      | 13951(16%)  | 18443(22%)    | 53385(62%)        |

Note: The size of genes, introns and intergenic regions in the mtDNA of *L. meyersii* (*Lmey*), *L. dasiensis* (*Ldas*), *L. thermotolerans* (*Lthe*), *L. kluyveri* (*Lklu*), *N. bacillisporus* (*Nbac*), *C. castellii* (*Ccas*), *N. delphensis* (*Ndel*), *C. glabrata* (*Cgla*), *N. castellii* (*Ncas*), *K. servazzii* (*Kser*), *S. uvarum* (*Suva*), *S. kudriavzevii* (*Skud*), *S. mikatae* (*Smik*), *S. paradoxus* (*Spar*), and *S. cerevisiae* (*Scer*).
