# Supplementary material for: Mitochondrial genome evolution in the Saccharomyces sensu stricto complex
Source: PubMed Central journal article supplement (PMC5558958; doi:10.1371/journal.pone.0183035), 2017-08-16
Supplement: pone.0183035.s007.pdf [file pone.0183035.s007.pdf]

**S3 Table. The size of *ori* sequences, ORFs, AT spacers and GC clusters in intergenic region**

| Species | ORFs    | Oris    | AT spacers | GC clusters |
|---------|---------|---------|------------|-------------|
| Cgla    | 0       | 0       | 2610       | 0           |
| Sbay    | 0       | 259(1)  | 25148      | 3023        |
| Skud    | 1425(1) | 1028(4) | 33497      | 2781        |
| Smik    | 1416(1) | 795(3)  | 27733      | 2039        |
| Spar    | 1578(2) | 2162(8) | 39253      | 1425        |
| Scer    | 2181(5) | 2305(8) | 39202      | 4909        |

Note: The number in the bracket of 'ORFs' and 'Oris' cols indicated the number of ORFs and *ori* sequences in different yeasts.
