# Supplementary material for: Mitochondrial genome evolution in the Saccharomyces sensu stricto complex
Source: PubMed Central journal article supplement (PMC5558958; doi:10.1371/journal.pone.0183035), 2017-08-16
Supplement: pone.0183035.s008.pdf [file pone.0183035.s008.pdf]

**S4 Table. The number of GC clusters in fifteen yeasts.**

|      | Exon       |            |           |           |            |             |             |             |             |             |             | Intron     |            |             |             | Intergenic |              | Sum |
|------|------------|------------|-----------|-----------|------------|-------------|-------------|-------------|-------------|-------------|-------------|------------|------------|-------------|-------------|------------|--------------|-----|
|      | <i>rns</i> | <i>rnl</i> | <i>tH</i> | <i>tP</i> | <i>cob</i> | <i>cox1</i> | <i>cox2</i> | <i>cox3</i> | <i>orf1</i> | <i>rpm1</i> | <i>var1</i> | <i>rnl</i> | <i>cob</i> | <i>cox1</i> | <i>orf1</i> | <i>ori</i> | <i>other</i> |     |
| Scer | 2          | 4          | 0         | 0         | 0          | 0           | 0           | 0           | 0           | 1           | 2           | 1          | 3          | 11          | 2           | 27         | 173          | 226 |
| Spar | 2          | 2          | 0         | 0         | 0          | 0           | 1           | 0           | 0           | 0           | 0           | 0          | 2          | 1           | 0           | 25         | 55           | 88  |
| Smik | 2          | 2          | 0         | 0         | 0          | 0           | 0           | 0           | 1           | 0           | 2           | 1          | 4          | 8           | 0           | 9          | 94           | 123 |
| Skud | 1          | 2          | 0         | 0         | 0          | 0           | 0           | 1           | 1           | 1           | 1           | 0          | 3          | 10          | 0           | 10         | 108          | 138 |
| Suva | 2          | 4          | 0         | 0         | 0          | 0           | 0           | 0           | 0           | 0           | 0           | 0          | 0          | 2           | 0           | 3          | 112          | 123 |
| Kser | 0          | 3          | 0         | 0         | 0          | 1           | 0           | 0           | 0           | 0           | 0           | 1          | 0          | 3           | 0           | 0          | 48           | 56  |
| Ncas | 0          | 2          | 0         | 0         | 1          | 0           | 0           | 0           | 0           | 0           | 0           | 0          | 0          | 3           | 0           | 0          | 28           | 34  |
| Cgla | 0          | 1          | 0         | 0         | 0          | 0           | 0           | 0           | 0           | 0           | 0           | 0          | 0          | 0           | 0           | 0          | 0            | 1   |
| Ndel | 0          | 1          | 0         | 0         | 0          | 1           | 0           | 0           | 0           | 0           | 0           | 0          | 0          | 0           | 0           | 0          | 14           | 16  |
| Ccas | 1          | 2          | 0         | 0         | 0          | 0           | 0           | 0           | 0           | 0           | 0           | 0          | 4          | 3           | 0           | 0          | 93           | 103 |
| Nbac | 2          | 2          | 0         | 1         | 0          | 0           | 0           | 0           | 0           | 0           | 0           | 0          | 0          | 0           | 0           | 0          | 280          | 285 |
| Lklu | 1          | 1          | 0         | 0         | 0          | 0           | 0           | 0           | 0           | 0           | 0           | 0          | 0          | 3           | 0           | 0          | 74           | 79  |
| Lthe | 5          | 6          | 0         | 0         | 0          | 0           | 0           | 0           | 0           | 1           | 0           | 0          | 0          | 14          | 0           | 0          | 35           | 61  |
| Ldas | 2          | 8          | 0         | 0         | 0          | 0           | 1           | 0           | 0           | 0           | 0           | 0          | 0          | 6           | 0           | 0          | 7            | 24  |
| Lmey | 2          | 3          | 1         | 0         | 0          | 0           | 0           | 0           | 0           | 2           | 0           | 0          | 3          | 10          | 0           | 0          | 48           | 69  |

Note: The mitochondrial genomes were divided into 'Exon', 'Introns' and 'Intergenic' regions. The 'Sum' col indicated sum of GC clusters in different yeasts.
