# Supplementary material for: Mitochondrial genome evolution in the Saccharomyces sensu stricto complex
Source: PubMed Central journal article supplement (PMC5558958; doi:10.1371/journal.pone.0183035), 2017-08-16
Supplement: pone.0183035.s010.pdf [file pone.0183035.s010.pdf]

**S6 Table. The 10 bp 5' and 3' flanking exon sequences of introns**

| The flanking sequences of 10 COX1 introns |                       | The flanking sequences of 7 COB introns |                       |
|-------------------------------------------|-----------------------|-----------------------------------------|-----------------------|
| ##### 1                                   |                       | ##### 1                                 |                       |
| Smik_COX1_1_168                           | TTATTTAATG-TTTTAGTAGT | Kser_COB_1_200                          | AGTAGAACAT-ATCATGAGAG |
| Scer_COX1_1_168                           | TTATTTAATG-TTTTAGTAGT | ##### 2                                 |                       |
| ##### 2                                   |                       | Lklu_COB_1_392                          | ATTTTAGGT-TATTGTTGTG  |
| Spar_COX1_1_204                           | ATGATTTTCT-TCTTAGTAAT | Lmey_COB_1_392                          | TTTCTTAGGT-TATTGTTGTG |
| Scer_COX1_2_203                           | ATGATTTTCT-TCTTAGTAAT | Sbay_COB_1_392                          | TTTCTTAGGT-TATTGTTGTG |
| ##### 3                                   |                       | Skud_COB_1_392                          | TTTTTAGGT-TATTGTTGTG  |
| Ccas_COX1_1_242                           | AGCTTATGGT-AATTATATGT | Smik_COB_1_392                          | TTTTTAGGT-TATTGTTGTG  |
| Ncas_COX1_1_239                           | AGGGTTTGGT-AATTATATGT | Spar_COB_1_392                          | TTTTTAGGT-TATTGTTGTG  |
| Nde1_COX1_1_239                           | AGGTTTGGT-AACTATATGT  | ##### 3                                 |                       |
| Cgla_COX1_1_239                           | AGGTTTGGT-AACTATATGT  | Skud_COB_2_413                          | TATGGACAGA-TGTCACATTG |
| Kser_COX1_1_239                           | AGGTTTGGT-AATTATATGT  | Smik_COB_2_413                          | TATGGACAGA-TGTCACATTG |
| Sbay_COX1_1_239                           | TGGGTTTGGT-AATTATTTAT | Spar_COB_2_413                          | TATGGACAGA-TGTCACATTG |
| Smik_COX1_2_238                           | AGGTTTGGT-AATTATTTAT  | Scer_COB_1_414                          | TATGGACAGA-TGTCACATTG |
| Lmey_COX1_1_239                           | AGGATTTGGT-AACTATTTAT | ##### 4                                 |                       |
| Ldas_COX1_1_239                           | AGGATTTGGT-AACTATTTAT | Skud_COB_3_426                          | ACATTGAGGT-GCACTAGTTA |
| Lthe_COX1_1_239                           | AGGGTTTGGT-AACTATTTAT | Smik_COB_3_426                          | ACATTGAGGT-GCACTAGTTA |
| Lklu_COX1_1_239                           | AGGGTTTGGT-AACTATTTAT | Spar_COB_3_426                          | ACATTGAGGT-GCACTAGTTA |
| Skud_COX1_1_239                           | AGGTTTGGT-AACTATTTAT  | Scer_COB_2_427                          | ACATTGAGGT-GCACTAGTTA |
| Scer_COX1_3_237                           | AGGTTTGGT-AACTATTTAT  | ##### 5                                 |                       |
| ##### 4                                   |                       | Lmey_COB_2_504                          | GAGGTGGGTT-CTCTGTATCA |
| Lmey_COX1_2_384                           | GATGAACTGT-ATATCCTCCT | Lklu_COB_2_504                          | GAGGAGGGTT-CTCAGTATCA |
| Lthe_COX1_2_384                           | GATGAACTGT-ATATCCTCCT | Skud_COB_4_502                          | GAGGTGGGTT-CTCAGTATCT |
| Lklu_COX1_2_384                           | GATGAACTGT-ATATCCTCCT | Smik_COB_4_502                          | GAGGTGGGTT-CTCAGTATCT |
| Kser_COX1_2_384                           | GATGAACTGT-GTATCCTCCT | Spar_COB_4_502                          | GAGGTGGGTT-CTCAGTATCT |
| Nde1_COX1_2_384                           | GTTGAACTGT-ATATCCACCA | Scer_COB_3_503                          | GAGGTGGGTT-CTCAGTATCT |
| Cgla_COX1_2_384                           | GTTGAACTGT-ATATCCACCA | ##### 6                                 |                       |
| Sbay_COX1_2_384                           | GATGAACTGT-ATATCCACCA | Smik_COB_5_751                          | TACTTTAGGT-CATCCTGATA |
| Skud_COX1_2_384                           | GATGAACTGT-ATATCCACCA | Scer_COB_4_752                          | TACTTTAGGT-CATCCTGATA |
| Smik_COX1_3_383                           | GATGAACTGT-ATATCCACCA | ##### 7                                 |                       |
| Spar_COX1_2_384                           | GATGAACTGT-ATATCCACCA | Ccas_COB_1_806                          | AGCTTCTATT-GTACCTGAAT |
| ##### 5                                   |                       | Smik_COB_6_801                          | AGCATCTATT-GTACCTGAAT |
| Nde1_COX1_3_706                           | CATTTGTTTT-GATTCTTCGG | Scer_COB_5_802                          | AGCATCTATT-GTACCTGAAT |
| Smik_COX1_4_705                           | CACTTATTTT-GATTCTTTGG |                                         |                       |
| Lklu_COX1_3_706                           | CATTTATTCT-GATTCTTTGG |                                         |                       |
| Sbay_COX1_3_706                           | CATTTATTTT-GATTCTTTGG |                                         |                       |
| Skud_COX1_3_706                           | CATTTATTTT-GATTCTTTGG |                                         |                       |
| ##### 6                                   |                       |                                         |                       |
| Scer_COX1_4_716                           | ATTCTTTGGT-CACCTGAAG  |                                         |                       |
| Ccas_COX1_2_721                           | ATTTTTGGT-CATCCGAAG   |                                         |                       |
| Lmey_COX1_3_717                           | ATTCTTCGGT-CATCCAGAAG |                                         |                       |
| Lthe_COX1_3_717                           | ATTCTTCGGT-CATCCAGAAG |                                         |                       |
| Ldas_COX1_2_718                           | ATTCTTTGGT-CATCCAGAAG |                                         |                       |
| Ncas_COX1_2_718                           | ATTCTTTGGT-CATCCAGAAG |                                         |                       |
| ##### 7                                   |                       |                                         |                       |
| Lmey_COX1_4_896                           | AGATGCAGAT-ACTAGAGCAT |                                         |                       |

  

| The flanking sequences of 1 21S_rRNA introns |                      |
|----------------------------------------------|----------------------|
| ##### 1                                      |                      |
| Lmey_21S_rRNA_1_2624                         | GCTAGGGATA-ACAGGTAAT |
| Ldas_21S_rRNA_1_2648                         | GCTAGGGATA-ACAGGTAAT |
| Lklu_21S_rRNA_1_2444                         | GCTAGGGATA-ACAGGTAAT |
| Ncas_21S_rRNA_1_2724                         | GCTAGGGATA-ACAGGTAAT |
| Kser_21S_rRNA_1_2439                         | GCTAGGGATA-ACAGGTAAT |
| Smik_21S_rRNA_1_2680                         | GCTAGGGATA-ACAGGTAAT |
| Spar_21S_rRNA_1_2588                         | GCTAGGGATA-ACAGGTAAT |
| Scer_21S_rRNA_1_2715                         | GCTAGGGATA-ACAGGTAAT |

|                  |                       |           |
|------------------|-----------------------|-----------|
| Ldas_COX1_3_897  | AGATGCAGAT-CTAGAGCAT  |           |
| Sbay_COX1_4_896  | AGATGCAGAT-CTAGAGCCT  |           |
| Ccas_COX1_3_900  | AGATGTAGAT-CTAGAGCCT  |           |
| #####            |                       | <b>8</b>  |
| Lmey_COX1_5_967  | CAGTTGATTA-GCACTTATTT |           |
| Ldas_COX1_4_968  | CAGTTGATTA-GCACTTATTT |           |
| Skud_COX1_4_968  | CTCATGATTA-GCTCTAATCT |           |
| Scer_COX1_5_967  | CTCATGATTA-GCTCTAATCC |           |
| Nde1_COX1_4_968  | CTCATGATTA-GCAACAATTT |           |
| Cgl1a_COX1_3_969 | CTCATGATTA-GCAACAATTT |           |
| Smik_COX1_5_967  | CTCATGATTA-GCGACAATCT |           |
| #####            |                       | <b>9</b>  |
| Kser_COX1_3_1104 | TTTCCATGAT-ACATACTACG |           |
| Lmey_COX1_6_1101 | ATTCCATGAT-ACTTACTATG |           |
| Sbay_COX1_5_1102 | ATTCCACGAT-ACTTATTACG |           |
| Smik_COX1_6_1101 | ATTCCACGAT-ACTTACTACG |           |
| Spar_COX1_3_1104 | ATTCCACGAT-ACTTACTACG |           |
| Scer_COX1_6_1101 | ATTCCACGAT-ACTTACTACG |           |
| #####            |                       | <b>10</b> |
| Sbay_COX1_6_1126 | GGACATTTCC-ATTATGTATT |           |
| Skud_COX1_5_1127 | GGACATTTTC-ACTATGTATT |           |
| Smik_COX1_7_1125 | GGACATTTTC-ACTATGTATT |           |
| Spar_COX1_4_1128 | GGACATTTTC-ACTATGTATT |           |
| Scer_COX1_7_1125 | GGACATTTTC-ACTATGTATT |           |

---

Note: The number after a series of ‘#’ represented the relative location of each intron in different yeasts. The flanking sequence was named according to ‘Species\_Gene\_ID\_Loc’, where the ‘ID’ indicated the absolute location of the intron in corresponding gene and species, the ‘Loc’ indicated the insert location of the intron in the coding sequence. For example, ‘Smik\_COX1\_1\_168’ represented the first intron of *cox1* gene in MT genome of *S.mikatae*, the intron inserted in the 168th nucleotide of coding sequence. The flanking sequence was showed according to “5’ 10 bp exon sequence-3’ 10 bp exon sequence”, where the ‘-’ represented the insert location of the intron in the coding sequence.
