# Supplementary material for: Mitochondrial genome evolution in the Saccharomyces sensu stricto complex
Source: PubMed Central journal article supplement (PMC5558958; doi:10.1371/journal.pone.0183035), 2017-08-16
Supplement: pone.0183035.s011.pdf [file pone.0183035.s011.pdf]

**S7 Table. The intron identity in four yeast lineages**

| Introns        | Intron amino-acid identity |            |            |            | Intron nucleotide identity (without ORF) |            |            |            |
|----------------|----------------------------|------------|------------|------------|------------------------------------------|------------|------------|------------|
|                | <i>Lachancea</i>           | <i>C/N</i> | <i>K/N</i> | <i>SSS</i> | <i>Lachancea</i>                         | <i>C/N</i> | <i>K/N</i> | <i>SSS</i> |
| <i>coxI_1</i>  | -                          | -          | -          | 0.99       | -                                        | -          | -          | -          |
| <i>coxI_2</i>  | -                          | -          | -          | 0.94       | -                                        | -          | -          | -          |
| <i>coxI_3</i>  | 0.88                       | 0.57       | -          | 0.86       | -                                        | -          | 0.48       | 0.57       |
| <i>coxI_4</i>  | 0.83                       | -          | -          | -          | -                                        | -          | -          | 0.51       |
| <i>coxI_5</i>  | -                          | -          | -          | 0.71       | -                                        | -          | -          | -          |
| <i>coxI_6</i>  | 0.88                       | -          | -          | -          | -                                        | -          | -          | -          |
| <i>coxI_7</i>  | 0.79                       | -          | -          | -          | -                                        | -          | -          | -          |
| <i>coxI_8</i>  | 0.97                       | 0.68       | -          | 0.95       | -                                        | -          | -          | -          |
| <i>coxI_9</i>  | -                          | -          | -          | 0.84       | -                                        | -          | -          | -          |
| <i>coxI_10</i> | -                          | -          | -          | -          | -                                        | -          | -          | 0.83       |
| <i>cob_1</i>   | -                          | -          | -          | -          | -                                        | -          | -          | -          |
| <i>cob_2</i>   | 0.67                       | -          | -          | 0.51       | -                                        | -          | -          | 0.73       |
| <i>cob_3</i>   | -                          | -          | -          | -          | -                                        | -          | -          | 0.83       |
| <i>cob_4</i>   | -                          | -          | -          | 0.76       | -                                        | -          | -          | -          |
| <i>cob_5</i>   | 0.95                       | -          | -          | 0.99       | -                                        | -          | -          | -          |
| <i>cob_6</i>   | -                          | -          | -          | 0.64       | -                                        | -          | -          | -          |
| <i>cob_7</i>   | -                          | -          | -          | -          | -                                        | -          | -          | 0.62       |
| <i>rnl_1</i>   | -                          | -          | -          | -          | 0.55                                     | -          | 0.63       | 0.77       |

Note: We firstly calculated the amino-acid identity of intron ORFs in different lineages. We then calculated the nucleotide identity for the introns without ORF. The rows with yellow backcolor were corresponding to Group II introns. The '-' indicated the intron did not present in the lineage, or only present in one species of the lineage.
