# Supplementary material for: Mitochondrial genome evolution in the Saccharomyces sensu stricto complex
Source: PubMed Central journal article supplement (PMC5558958; doi:10.1371/journal.pone.0183035), 2017-08-16
Supplement: pone.0183035.s012.pdf [file pone.0183035.s012.pdf]

**S8 Table. Seven blocks in mitochondria genome of SSS**

| Blocks | Transcriptional units | Genes                                                                                                                                                   |                                                                                              |
|--------|-----------------------|---------------------------------------------------------------------------------------------------------------------------------------------------------|----------------------------------------------------------------------------------------------|
| 1      | 1.1                   | <i>rnl</i><br><i>tRNA-Thr2</i>                                                                                                                          |                                                                                              |
|        | 1.2                   | <i>tRNA-Cys</i><br><i>tRNA-His</i>                                                                                                                      |                                                                                              |
|        | 1.3                   | <i>tRNA-Leu</i><br><i>tRNA-Gln</i><br><i>tRNA-Lys</i><br><i>tRNA-Arg1</i><br><i>tRNA-Gly</i><br><i>tRNA-Asp</i><br><i>tRNA-Ser1</i><br><i>tRNA-Arg2</i> |                                                                                              |
|        |                       | 1.4                                                                                                                                                     | <i>tRNA-Ala</i><br><i>tRNA-Ile</i><br><i>tRNA-Tyr</i><br><i>tRNA-Asn</i><br><i>tRNA-Met1</i> |
|        |                       |                                                                                                                                                         | 1.5                                                                                          |
| 2      |                       |                                                                                                                                                         | 2.1                                                                                          |
|        | 2.2                   |                                                                                                                                                         | <i>tRNA-Thr1</i>                                                                             |
| 3      | 3.1                   | <i>tRNA-Met2</i>                                                                                                                                        |                                                                                              |
|        | 3.2                   | <i>RPM1</i><br><i>tRNA-Pro</i>                                                                                                                          |                                                                                              |
| 4      | 4.1                   | <i>cox1</i><br><i>atp8</i><br><i>atp6</i>                                                                                                               |                                                                                              |
| 5      | 5.1                   | <i>tRNA-Glu</i><br><i>cob</i>                                                                                                                           |                                                                                              |
| 6      | 6.1                   | <i>rns</i><br><i>tRNA-Trp</i>                                                                                                                           |                                                                                              |
| 7      | 7.1                   | <i>atp9</i>                                                                                                                                             |                                                                                              |
|        | 7.2                   | <i>tRNA-Ser2</i><br><i>var1</i>                                                                                                                         |                                                                                              |

Note: All 35 genes were divided into seven syntenic orthologs blocks constituted by fourteen transcriptional units known in *S. cerevisiae*. For other SSS yeasts, we predicted transcription initiation site based on the motif WTATAAGTA. The predicted transcriptional units were similar to that in *S. cerevisiae* (data not shown).
