# Supplementary material for: Mitochondrial genome evolution in the Saccharomyces sensu stricto complex
Source: PubMed Central journal article supplement (PMC5558958; doi:10.1371/journal.pone.0183035), 2017-08-16
Supplement: pone.0183035.s013.pdf [file pone.0183035.s013.pdf]

**S9 Table. The number of rearrangement events between SSS yeasts**

|                       | <i>S.cerevisiae</i> | <i>S.paradoxus</i> | <i>S.mikatae</i> | <i>S.kudriavzevii</i> | <i>S.uvarum</i> |
|-----------------------|---------------------|--------------------|------------------|-----------------------|-----------------|
| <i>S.cerevisiae</i>   | 0                   | 2                  | 1                | 2                     | 3               |
| <i>S.paradoxus</i>    | -                   | 0                  | 3                | 3                     | 4               |
| <i>S.mikatae</i>      | -                   | -                  | 0                | 1                     | 3               |
| <i>S.kudriavzevii</i> | -                   | -                  | -                | 0                     | 3               |
| <i>S.uvarum</i>       | -                   | -                  | -                | -                     | 0               |

Note: The upper triangle of the table indicated the number of rearrangement events. The rearrangement scenarios were showed in supplement file (S1B File) in more detail.
