# Supplementary material for: Mitochondrial genome evolution in the Saccharomyces sensu stricto complex
Source: PubMed Central journal article supplement (PMC5558958; doi:10.1371/journal.pone.0183035), 2017-08-16
Supplement: pone.0183035.s014.pdf [file pone.0183035.s014.pdf]

**S10 Table. Branch-Specific Rates of GOL in fifteen yeasts**

| Leaf_Node | Branch | Branch Length | bsGOL   | MT GOL Rate | Nuclear GOL Rate | MT/Nuclear rate |
|-----------|--------|---------------|---------|-------------|------------------|-----------------|
| Scer      | 1      | 0.008116      | 0.04369 | 5.38        | 0.28             | 19.2            |
| Spar      | 2      | 0.008054      | 0.07031 | 8.73        | 0.30             | 29.1            |
|           | 3      | 0.003727      | 0.01802 | 4.84        | .....            | .....           |
| Smik      | 4      | 0.007134      | 0.03948 | 5.53        | .....            | .....           |
|           | 5      | 0.008487      | 0.00000 | 0.00        | .....            | .....           |
| Skud      | 6      | 0.014752      | 0.04153 | 2.82        | .....            | .....           |
|           | 7      | 0.016253      | 0.08952 | 5.51        | .....            | .....           |
| Suva      | 8      | 0.016273      | 0.04550 | 2.80        | .....            | .....           |
|           | 9      | 0.064636      | 0.19681 | 3.04        | .....            | .....           |
| Kser      | 10     | 0.153053      | 0.23504 | 1.54        | .....            | .....           |
| Ncas      | 11     | 0.131335      | 0.08896 | 0.68        | .....            | .....           |
|           | 12     | 0.037610      | 0.03119 | 0.83        | .....            | .....           |
|           | 13     | 0.018514      | 0.00000 | 0.00        | .....            | .....           |
| Cgla      | 14     | 0.029167      | 0.00000 | 0.00        | .....            | .....           |
| Ndel      | 15     | 0.033600      | 0.00000 | 0.00        | .....            | .....           |
|           | 16     | 0.063384      | 0.19098 | 3.01        | .....            | .....           |
| Ccas      | 17     | 0.111547      | 0.18458 | 1.65        | .....            | .....           |
| Nbac      | 18     | 0.104545      | 0.37442 | 3.58        | .....            | .....           |
|           | 19     | 0.054711      | 0.05902 | 1.08        | .....            | .....           |
|           | 20     | 0.018655      | 0.00000 | 0.00        | .....            | .....           |
| Lklu      | 21     | 0.036597      | 0.04955 | 1.35        | .....            | .....           |
| Lthe      | 22     | 0.012066      | 0.00000 | 0.00        | .....            | .....           |
| Ldas      | 23     | 0.014757      | 0.00000 | 0.00        | .....            | .....           |
| Lmey      | 24     | 0.008364      | 0.00000 | 0.00        | .....            | .....           |
|           | 25     | 0.008626      | 0.00000 | 0.00        | .....            | .....           |
|           | 26     | 0.040301      | 0.03645 | 0.90        | .....            | .....           |
|           | 27     | 0.081310      | 0.08169 | 1.00        | .....            | .....           |

Note: The 'Branch' col indicated all evolutionary branches in the phylogenetic tree of fifteen yeasts (S4 Fig). The 'Leaf\_Node' col indicated the branches which included leaf nodes (i.e., fifteen yeasts). The 'Branch Length' col indicated the length of each branch in the phylogenetic tree. The 'MT bsGOL' indicated the branch-specific GOL of mitochondrial genome based on the pairwise comparisons of GOL. The 'MT GOL Rate' indicated the rearrangement rate of gene order in mitochondrial genome which was calculated by the ratio of bsGOL to branch length. The 'Nuclear GOL Rate' indicated the GOL rates in the nuclear genome of *S. cerevisiae* and *S. paradoxus* which were from Fischer *et al.* 2006.
