# Supplementary material for: Mitochondrial genome evolution in the Saccharomyces sensu stricto complex
Source: PubMed Central journal article supplement (PMC5558958; doi:10.1371/journal.pone.0183035), 2017-08-16
Supplement: pone.0183035.s016.pdf [file pone.0183035.s016.pdf]

**S12 Table. The dN/dS ratio for all lineages**

| #Spe1-Spe2     | COX1          | COX2          | COX3          | ATP6          | ATP8          | ATP9          | COB           | VARI          |
|----------------|---------------|---------------|---------------|---------------|---------------|---------------|---------------|---------------|
| Lklu-Ldas      | 0.0802        | 0.1385        | 0.1557        | 0.2292        | 0.1384        | 0.0423        | 0.116         | 0.9799        |
| Lmey-Ldas      | 0.0311        | 0.0657        | 0.1068        | 0.0893        | 0.1513        | 0.1085        | 0.0405        | 0.2859        |
| Lmey-Lklu      | 0.0762        | 0.1199        | 0.1851        | 0.2824        | 0.0758        | 0.0664        | 0.1413        | 0.6666        |
| Lthe-Ldas      | 0.077         | 0.0914        | 0.1372        | 0.0614        | 0.0726        | 0             | 0.1068        | 0.3431        |
| Lthe-Lklu      | 0.092         | 0.0869        | 0.1872        | 0.2732        | 0.0431        | 0.0629        | 0.0782        | 0.7399        |
| Lthe-Lmey      | 0.0489        | 0.0681        | 0.1304        | 0.0574        | 0             | 0.0816        | 0.1274        | 0.1941        |
| <b>Average</b> | <b>0.0676</b> | <b>0.0951</b> | <b>0.1504</b> | <b>0.1655</b> | <b>0.0802</b> | <b>0.0603</b> | <b>0.1017</b> | <b>0.5349</b> |
| <b>Rank</b>    | <b>7</b>      | <b>5</b>      | <b>3</b>      | <b>2</b>      | <b>6</b>      | <b>8</b>      | <b>4</b>      | <b>1</b>      |
| Ccas-Cgla      | 0.1799        | 0.4076        | 0.4017        | 0.6908        | 0.4332        | 0.2369        | 0.2734        | 1.1595        |
| Nbac-Cgla      | 0.1779        | 0.4012        | 0.3379        | 0.6057        | 0.4255        | 0.2548        | 0.2768        | 1.136         |
| Nbac-Ccas      | 0.1317        | 0.3139        | 0.4561        | 0.5677        | 0.4654        | 0.0758        | 0.2362        | 1.0978        |
| Ndel-Cgla      | 0.0329        | 0.1104        | 0.1039        | 0.2053        | 0.0261        | 0.1022        | 0.0299        | 0.3713        |
| Ndel-Ccas      | 0.1631        | 0.2714        | 0.4242        | 0.7253        | 0.1931        | 0.3607        | 0.2438        | 1.0531        |
| Ndel-Nbac      | 0.1458        | 0.2737        | 0.3384        | 0.5631        | 0.3281        | 0.4796        | 0.2475        | 0.8887        |
| <b>Average</b> | <b>0.1386</b> | <b>0.2964</b> | <b>0.3437</b> | <b>0.5597</b> | <b>0.3119</b> | <b>0.2517</b> | <b>0.2179</b> | <b>0.9511</b> |
| <b>Rank</b>    | <b>8</b>      | <b>5</b>      | <b>3</b>      | <b>2</b>      | <b>4</b>      | <b>6</b>      | <b>7</b>      | <b>1</b>      |
| Ncas-Kser      | 0.1806        | 0.1414        | 0.3307        | 0.6486        | 0.5509        | 0.2389        | 0.2157        | 0.896         |
| <b>Average</b> | <b>0.1806</b> | <b>0.1414</b> | <b>0.3307</b> | <b>0.6486</b> | <b>0.5509</b> | <b>0.2389</b> | <b>0.2157</b> | <b>0.8960</b> |
| <b>Rank</b>    | <b>7</b>      | <b>8</b>      | <b>4</b>      | <b>2</b>      | <b>3</b>      | <b>5</b>      | <b>6</b>      | <b>1</b>      |
| Scer-Suva      | 0.0698        | 0.0652        | 0.0526        | 0.163         | 0.1344        | 0             | 0.0963        | 0.2887        |
| Skud-Suva      | 0.0547        | 0.0735        | 0.0779        | 0.1636        | 0.1789        | 0             | 0.0842        | 0.882         |
| Skud-Scer      | 0.0985        | 0.0474        | 0.0853        | 0.1853        | 0.2749        | 0             | 0.0658        | 0.5414        |
| Smik-Suva      | 0.04          | 0.116         | 0.063         | 0.19          | 0.1344        | 0             | 0.0853        | 0.4383        |
| Smik-Scer      | 0.0779        | 0.1504        | 0.0509        | 0.1738        | 0             | 0             | 0.1229        | 0.6015        |
| Smik-Skud      | 0.0571        | 0.0585        | 0.0448        | 0.2061        | 0.2749        | 0             | 0.0277        | 0.4935        |
| Spar-Suva      | 0.0557        | 0.116         | 0.0549        | 0.1652        | 0.1789        | 0             | 0.1258        | 0.3581        |
| Spar-Scer      | 0.074         | 0.1113        | 0.0562        | 0.2735        | 0.2749        | 0             | 0.0748        | 0.661         |
| Spar-Skud      | 0.0476        | 0.0421        | 0.06          | 0.1487        | 0             | 0             | 0.0849        | 0.5981        |
| Spar-Smik      | 0.0316        | 0.0838        | 0.0757        | 0.2272        | 0.2749        | 0             | 0.1205        | 0.5408        |
| <b>Average</b> | <b>0.0607</b> | <b>0.0864</b> | <b>0.0621</b> | <b>0.1896</b> | <b>0.1726</b> | <b>0.0000</b> | <b>0.0888</b> | <b>0.5403</b> |
| <b>Rank</b>    | <b>7</b>      | <b>5</b>      | <b>6</b>      | <b>2</b>      | <b>3</b>      | <b>8</b>      | <b>4</b>      | <b>1</b>      |

Note: The 'Average' rows in the table indicated the average of the dN/dS ratio of each mitochondria protein between two close relative species in the same lineage. The number in 'Rank' rows represent the rank number based on the 'Average'.
