# Supplementary material for: Mitochondrial genome evolution in the Saccharomyces sensu stricto complex
Source: PLoS One. 2017 Aug 16;12(8):e0183035. doi: 10.1371/journal.pone.0183035 (PMC5558958; doi:10.1371/journal.pone.0183035)
Supplement: S5 Table — The ‘Num’ col indicated the number of GC clusters in the MT genome of each yeast. The ‘Palindromic’ col indicated the proportion of palindromic-like GC clusters. The ‘FamilyNum’ indicated the number of the main sub-families in each yeast (number > = 8). The ‘Consensus’ and ‘RC Consensus’ cols indicated the consensus sequence and the reverse complementary sequence of each subfamily. In the ‘Features’ col, * = The al and a2 family in de Zamaroczy and Bernardi, 1986; & = GC clusters A, B, C of ori sequences. (PDF) [file pone.0183035.s009.pdf]

**S5 Table. The distribution and characteristic of GC clusters in different yeast lineages**

| Species | Num | Palindromic | FamilyNum | Consensus                                | RC Consensus                           | Features                               |
|---------|-----|-------------|-----------|------------------------------------------|----------------------------------------|----------------------------------------|
| Lmey    | 69  | 17%         | 25        | GGGGGGGGGGGG                             | CCCCCCCCCCCC                           | p1oy(G)s<br>or<br>p1oly(C)s            |
|         |     |             | 9         | GTGTGGGGGGGC                             | GGCCCCCAGAC                            |                                        |
| Ldas    | 24  | 12%         | 21        | GGAGGGGG                                 | CCCCCTCC                               |                                        |
|         |     |             | 13        | GGGGGGGGGGAGG                            | CTTCCCCCCCCC                           |                                        |
| Lthe    | 61  | 28%         | 12        | CTTTCGGGGGGGG                            | CCCCCCCCGAAGG                          |                                        |
|         |     |             | 8         | CTTGGGGGGGGGGG                           | CCCCCCCCCAGG                           |                                        |
|         |     |             | 8         | GGAGGGGGGGGGG                            | CCCCCCCCCTCC                           |                                        |
| Lklu    | 79  | 13%         | 24        | GTGACCGGCGGG                             | CCCCGGGTAC                             |                                        |
|         |     |             | 11        | GGCACCCCCCCC                             | GGGGGGGGGTGGC                          |                                        |
|         |     |             | 8         | CTTCCCCCCCCC                             | GGGGGGGGGGAGG                          |                                        |
| Nbac    | 285 | 25%         | 75        | GACGCGGG                                 | CCCCGCGTC                              | -----                                  |
|         |     |             | 49        | CCCCGCGC                                 | GGCGCGGG                               |                                        |
|         |     |             | 36        | CCCCGGAC                                 | GTGCGGG                                |                                        |
|         |     |             | 20        | GGACTACGGGGGGG                           | CCCCCGTAGTCC                           |                                        |
| Ccas    | 103 | 48%         | 52        | GGCCCCGG                                 | CCCCGGGC                               |                                        |
|         |     |             | 16        | GACCCGGGGGGG                             | CCCCCGGGGTC                            |                                        |
|         |     |             | 12        | GGGGCTAGCCGGGG                           | CCCCGGCTAGCCCC                         |                                        |
| Ndel    | 16  | 18%         | 17        | GGTCCGGG                                 | CCCCGACC                               |                                        |
| Ncas    | 34  | 14%         | 8         | GGGACGGGGG                               | CCCCGCGTCCC                            |                                        |
|         |     |             | 8         | GGGGGGGGGGGG                             | GGCCCCCCCCC                            |                                        |
| Kser    | 56  | 20%         | 9         | CTGCGGGAG                                | CTCCGGGAG                              | a2 like*<br>-----<br>Cluster B&        |
|         |     |             | 32        | GGCCCCGGCCCCGGGGCCGGGACCCGCTAGGAG        | CTCTAGCGGGGTCCCGGGCCCGGGGGCCCCGGGGC    |                                        |
| Sbay    | 123 | 31%         | 19        | GTGGGGGGGGGCGGAGCGCGAGGAG                | CTCTTCGGGCTCGGCCCCCCCCGAC              |                                        |
|         |     |             | 17        | CGGGTCCC                                 | GGGACCG                                |                                        |
|         |     |             | 13        | CTCTAGGCGTCCGCCCCCCCCCGGGGGGGC           | GGCCCCCGGGGGGGGGCGGACGCGTAGGAG         |                                        |
| Skud    | 138 | 22%         | 50        | CGGGCCCCAGCGGGACCCGTTAGGG                | CCCTAAGGGGGTCCCGGCTGGGGCGG             |                                        |
|         |     |             | 45        | CTCTTACGGGGTCCGGCTGGGGCCGGGAC            | GTCCCCGGCCCCAGCGGGACCCGTTAGGAG         |                                        |
|         |     |             | 24        | CGGGGTTCGGCTCCGCTACGGGCCCCGGAGC          | GTTCGGGGCCCCGGTACGGGAGCGAGACCCCG       |                                        |
|         |     |             | 18        | CGGGCCCCCCCCCG                           | CGGGGGGGGGGGCGG                        |                                        |
| Smik    | 123 | 28%         | 20        | CGGGTCCC                                 | GGGACCCG                               |                                        |
|         |     |             | 20        | GTCCCCGGCCCCAGCGGGACCCCGAGGAG            | CTCTCGGGGTCCCGGCTGGGGCCGGGAC           | Cluster B&<br>Cluster A&<br>Cluster C& |
|         |     |             | 18        | GGCCCCCTAACCGGGTCCCGTG                   | CACCGGGACCCGGTTAGGGGCC                 |                                        |
| Spar    | 88  | 30%         | 30        | CGGGACCCGG                               | CCGGGTCCGG                             |                                        |
|         |     |             | 17        | GGTGGGGTCCC                              | GGGACCCGACC                            |                                        |
|         |     |             | 10        | GGGGGAGGGGGTGGTG                         | CACCCACCCCTCCCCC                       |                                        |
| Scer    | 226 | 33%         | 47        | CTCTTTTGGGGTTCCGGCTCCGCTGGGCGGGCCCCGGAGC | GTTCGGGGCCCCGGCACGGGACCGGAGCCCCGAAGGAG |                                        |
|         |     |             | 27        | GTCCGGGCGCCCCCGGGGGCGACCCCCGAGGAG        | CTCTTCGGGGTCCCGCCCCGGGGGGCGGGCGGAC     |                                        |
|         |     |             | 23        | GGGACCCCC                                | GGGGGTCCC                              |                                        |
|         |     |             | 18        | GGGGACCCGG                               | CCGGGTCCCC                             |                                        |

Note: The ‘Num’ col indicated the number of GC clusters in the MT genome of each yeast. The ‘Palindromic’ col indicated the proportion of palindromic-like GC clusters. The ‘FamilyNum’ indicated the number of the main sub-families in each yeast (number >= 8). The ‘Consensus’ and ‘RC Consensus’ cols indicated the consensus sequence and the reverse complementary sequence of each subfamily. In the ‘Features’ col, \* = The a1 and a2 family in de Zamaroczy and Bernardi, 1986; & = GC clusters A, B, C of *ori* sequences.
